# Supplementary material for: Long-term follow-up of applying autologous bone grafts for reconstructing tympanomastoid defects in functional cholesteatoma surgery
Source: PeerJ. 2021 Nov 23;9:e12522. doi: 10.7717/peerj.12522 (PMC8621709; doi:10.7717/peerj.12522)
Supplement: Supplemental Information 1 — All patients with cholesteatoma admitted for functional tympanomastoidectomy using only bone chips for reconstruction in a single tertiary hospital between 2010 and 2018. [file peerj-09-12522-s001.xlsx]

## Sheet: 工作表1
sex	age	age_	ear	preOP	HTN	DM	AR	SMO	PreAC_0.5K	PreAC_1K	PreAC_2K	PreAC_4K	Pre_PTA	Pre_PTA_	PreBC_0.5K	PreBC_1K	PreBC_2K	PreBC_4K	PreABG_0.5K	PreABG_1K	PreABG_2K	PreABG_4K	Pre_ABG	PostAC_0.5K	PostAC_1K	PostAC_2K	PostAC_4K	Post_PTA	PostBC_0.5K	PostBC_1K	PostBC_2K	PostBC_4K	PostABG_0.5K	PostABG_1K	PostABG_2K	PostABG_4K	Post_ABG	PTA_imp	ABG_imp	success	site	site_	stage	stage_	Type_T	Type III	Graft_III	stapes	stapes_
1	29	0	1	0	0	0	1	0	50	50	50	50	50	1	10	10	10	10	40	40	40	40	40	60	60	60	60	60	20	15	25	20	40	45	35	40	40	-10	0	0	3	1	2	2	2	2	1	0	0
0	45	0	1	0	0	0	0	0	30	35	25	30	30	0	15	15	10	10	15	20	15	20	17.5	25	30	25	35	28.75	15	10	15	30	10	20	10	5	11.25	1.25	6.25	0	1	1	1	1	1	0	0	0	0
1	41	0	0	0	0	0	0	0	20	20	15	15	17.5	0	5	0	5	5	15	20	10	10	13.75	15	15	10	5	11.25	5	0	0	5	10	15	10	0	8.75	6.25	5	0	3	1	2	2	1	0	0	0	0
1	59	1	0	0	1	1	0	0	60	70	70	70	67.5	1	30	35	35	50	30	35	35	20	30	55	65	60	70	62.5	30	35	35	50	25	30	25	20	25	5	5	0	3	1	3	2	4	0	0	2	1
1	59	1	0	0	1	0	0	0	70	95	85	115	91.25	1	25	45	50	80	45	50	35	35	41.25	85	100	95	120	100	55	70	75	70	30	30	20	50	32.5	-8.75	8.75	0	1	1	1	1	2	2	1	0	0
0	26	0	0	0	0	0	0	0	60	50	35	35	45	1	15	5	10	15	45	45	25	20	33.75	35	35	20	20	27.5	15	5	10	10	20	30	10	10	17.5	17.5	16.25	1	1	1	1	1	2	2	1	0	0
1	8	0	0	0	0	0	0	0	25	35	35	30	31.25	1	10	5	25	5	15	30	10	25	20	25	20	25	20	22.5	15	0	5	0	10	20	20	20	17.5	8.75	2.5	0	3	1	2	2	2	2	2	0	0
0	15	0	0	0	0	0	0	0	50	55	35	25	41.25	1	5	10	15	15	45	45	20	10	30	25	20	20	30	23.75	10	10	10	15	15	10	10	15	12.5	17.5	17.5	0	3	1	2	2	2	2	2	0	0
1	60	1	0	0	0	0	0	1	70	75	70	90	76.25	1	40	45	55	65	30	30	15	25	25	65	75	55	60	63.75	55	40	35	40	10	35	20	20	21.25	12.5	3.75	1	3	1	2	2	4	0	0	2	1
1	47	1	1	0	0	0	0	0	35	40	55	55	46.25	1	15	5	15	10	20	35	40	45	35	25	30	40	40	33.75	15	5	15	10	10	25	25	30	22.5	12.5	12.5	1	1	1	1	1	1	0	0	0	0
1	40	0	1	0	0	1	0	1	50	50	30	75	51.25	1	25	30	20	15	25	20	10	60	28.75	55	40	40	50	46.25	15	15	10	25	40	25	30	25	30	5	-1.25	0	3	1	2	2	3	3	4	2	1
1	52	1	1	0	1	0	0	1	35	30	25	60	37.5	0	15	10	20	30	20	20	5	30	18.75	30	25	25	40	30	15	10	20	30	15	15	5	10	11.25	7.5	7.5	0	3	1	2	2	1	0	0	0	0
1	45	0	0	0	0	0	0	1	35	30	30	40	33.75	0	20	20	20	30	15	10	10	10	11.25	35	35	40	50	40	10	10	25	20	25	25	15	30	23.75	-6.25	-12.5	0	2	2	1	1	1	0	0	0	0
0	28	0	1	0	0	0	0	0	65	65	55	45	57.5	1	25	15	15	15	40	50	40	30	40	20	15	5	10	12.5	10	5	0	5	10	10	5	5	7.5	45	32.5	1	1	1	1	1	1	0	0	0	0
0	37	0	0	0	0	0	0	0	35	35	35	40	36.25	0	25	10	10	15	10	25	25	25	21.25	30	15	15	45	26.25	20	-5	5	25	10	20	10	20	15	10	6.25	1	3	1	2	2	2	2	2	0	0
0	62	1	1	0	0	0	0	0	65	60	70	75	67.5	1	30	20	25	30	35	40	45	45	41.25	40	40	25	50	38.75	30	25	25	25	10	15	0	25	12.5	28.75	28.75	0	3	1	2	2	2	2	2	0	0
0	28	0	0	0	0	0	0	0	45	60	45	25	43.75	1	30	15	5	25	15	45	40	0	25	40	40	25	30	33.75	15	5	5	15	25	35	20	15	23.75	10	1.25	1	1	1	1	1	1	0	0	0	0
0	74	1	1	0	0	0	0	0	110	110	110	115	111.25	1	65	65	80	80	45	45	30	35	38.75	95	90	95	110	97.5	70	65	70	80	25	25	25	30	26.25	13.75	12.5	1	1	1	1	1	2	2	1	0	0
1	29	0	1	0	0	0	0	0	40	45	25	35	36.25	0	25	15	15	15	15	30	10	20	18.75	45	45	45	40	43.75	15	20	25	20	30	25	20	20	23.75	-7.5	-5	0	3	1	3	2	2	2	2	1	0
1	23	0	1	0	0	0	0	0	90	85	95	85	88.75	1	45	45	55	55	45	40	40	30	38.75	90	95	100	110	98.75	65	65	75	80	25	30	25	30	27.5	-10	11.25	0	3	1	3	2	3	3	3	2	1
0	47	1	1	0	0	0	0	0	40	50	35	45	42.5	1	20	15	25	20	20	35	10	25	22.5	55	55	60	65	58.75	25	5	35	30	30	50	25	35	35	-16.25	-12.5	0	3	1	2	2	2	2	1	0	0
0	56	1	1	0	1	0	1	0	90	85	75	70	80	1	40	30	45	35	50	55	30	35	42.5	50	55	45	80	57.5	40	35	30	45	10	20	15	35	20	22.5	22.5	1	1	1	1	1	2	2	2	0	0
1	42	0	1	0	0	0	0	0	30	40	25	45	35	0	5	5	15	25	25	35	10	20	22.5	10	15	10	15	12.5	5	10	10	5	5	5	0	10	5	22.5	17.5	1	1	1	1	1	1	0	0	0	0
1	55	1	0	0	0	0	0	0	75	80	70	75	75	1	35	35	40	50	40	45	30	25	35	45	55	40	60	50	10	25	30	45	35	30	10	15	22.5	25	12.5	1	3	1	2	2	1	0	0	0	0
0	70	1	1	0	0	1	0	0	60	75	60	55	62.5	1	40	45	40	40	20	30	20	15	21.25	55	70	65	65	63.75	45	50	50	60	10	20	15	5	12.5	-1.25	8.75	0	1	1	1	1	2	2	1	0	0
1	39	0	1	0	0	0	0	0	50	40	25	60	43.75	1	15	10	15	25	35	30	10	35	27.5	35	35	20	30	30	20	15	10	15	15	20	10	15	15	13.75	12.5	1	1	1	1	1	2	2	2	0	0
0	55	1	1	0	0	0	0	0	60	40	40	35	43.75	1	20	10	20	10	40	30	20	25	28.75	30	30	20	30	27.5	15	15	5	10	15	15	15	20	16.25	16.25	12.5	1	2	2	1	1	2	2	1	0	0
1	43	0	0	0	0	0	0	0	55	40	45	50	47.5	1	25	30	25	25	30	10	20	25	21.25	35	40	35	35	36.25	25	25	25	30	10	15	10	5	10	11.25	11.25	1	1	1	1	1	1	0	0	0	0
1	50	1	1	0	1	1	0	1	45	50	45	40	45	1	30	15	25	25	15	35	20	15	21.25	45	45	25	40	38.75	25	15	15	20	20	30	10	20	20	6.25	1.25	0	3	1	2	2	2	2	1	0	0
1	60	1	0	0	0	0	0	0	40	50	50	65	51.25	1	15	25	35	45	25	25	15	20	21.25	35	50	35	50	42.5	15	30	25	40	20	20	10	10	15	8.75	6.25	0	3	1	2	2	2	2	3	0	0
0	65	1	0	0	0	0	0	0	45	50	25	65	46.25	1	30	25	25	30	15	25	0	35	18.75	60	50	45	60	53.75	35	30	35	40	25	20	10	20	18.75	-7.5	0	0	3	1	2	2	2	2	3	0	0
0	31	0	0	0	0	0	0	0	35	35	20	25	28.75	0	20	10	5	15	15	25	15	10	16.25	25	35	10	20	22.5	10	5	0	10	15	30	10	10	16.25	6.25	0	0	3	1	2	2	2	2	1	0	0
0	55	1	0	0	0	0	0	0	65	60	65	65	63.75	1	20	20	25	30	45	40	40	35	40	55	45	45	75	55	25	20	25	45	30	25	20	30	26.25	8.75	13.75	0	1	1	1	1	2	2	1	0	0
0	44	0	0	0	0	0	0	0	40	50	35	35	40	0	35	35	15	20	5	15	20	15	13.75	35	45	25	25	32.5	30	30	15	15	5	15	10	10	10	7.5	3.75	0	1	1	1	1	1	0	0	0	0
0	54	1	1	0	0	0	0	0	50	55	45	50	50	1	15	10	25	40	35	45	20	10	27.5	50	60	60	65	58.75	15	20	35	40	35	40	25	25	31.25	-8.75	-3.75	0	3	1	2	2	2	2	1	0	0
1	32	0	1	0	0	0	0	0	40	35	15	20	27.5	0	25	5	5	15	15	30	10	5	15	35	25	15	20	23.75	25	5	10	15	10	20	5	5	10	3.75	5	0	3	1	2	2	1	0	0	0	0
1	24	0	1	0	0	0	0	0	35	20	30	25	27.5	0	15	5	20	15	20	15	10	10	13.75	15	20	25	20	20	5	0	5	10	10	20	20	10	15	7.5	-1.25	0	2	2	1	1	1	0	0	0	0
0	62	1	0	0	0	0	0	0	65	65	55	25	52.5	1	20	25	20	5	45	40	35	20	35	45	45	40	25	38.75	20	25	30	25	25	20	10	0	13.75	13.75	21.25	1	3	1	2	2	1	0	0	0	0
1	56	1	1	0	0	0	0	1	50	50	65	80	61.25	1	25	15	45	70	25	35	20	10	22.5	50	55	70	90	66.25	30	20	60	70	20	35	10	20	21.25	-5	1.25	0	3	1	2	2	1	0	0	0	0
0	59	1	0	0	1	0	0	0	35	45	50	55	46.25	1	20	30	25	40	15	15	25	15	17.5	50	55	60	70	58.75	45	45	55	65	5	10	5	5	6.25	-12.5	11.25	0	3	1	2	2	2	2	1	0	0
0	32	0	0	0	0	0	0	0	25	35	40	30	32.5	0	10	0	20	30	15	35	20	0	17.5	15	25	20	25	21.25	0	0	10	25	15	25	10	0	12.5	11.25	5	1	3	1	2	2	2	2	1	0	0
0	52	1	1	0	0	0	0	0	15	25	20	15	18.75	0	5	15	10	10	10	10	10	5	8.75	15	25	20	15	18.75	5	15	10	10	10	10	10	5	8.75	0	0	1	1	1	1	1	1	0	0	0	0
1	61	1	1	0	1	0	0	0	70	75	75	110	82.5	1	35	30	45	80	35	45	30	30	35	50	60	45	90	61.25	35	45	35	75	15	15	10	15	13.75	21.25	21.25	1	1	1	1	1	2	2	1	1	0
0	45	0	0	1	0	0	0	0	55	65	60	35	53.75	1	5	25	30	20	50	40	30	15	33.75	50	50	45	40	46.25	10	20	25	25	40	30	20	15	26.25	7.5	7.5	0	5	2	2	2	3	3	1	2	1
1	28	0	0	0	0	0	0	0	50	45	50	25	42.5	1	20	5	20	10	30	40	30	15	28.75	20	15	15	5	13.75	10	0	10	0	10	15	5	5	8.75	28.75	20	1	3	1	2	2	2	2	1	0	0
0	58	1	1	1	0	0	0	0	55	65	70	75	66.25	1	40	20	25	35	15	45	45	40	36.25	45	40	30	35	37.5	25	20	15	25	20	20	15	10	16.25	28.75	20	1	3	1	2	2	2	2	1	0	0
1	48	1	1	0	0	0	0	1	65	70	55	55	61.25	1	20	20	35	35	45	50	20	20	33.75	25	30	45	45	36.25	15	10	30	30	10	20	15	15	15	25	18.75	0	3	1	2	2	3	3	2	2	1
0	55	1	1	0	0	0	0	0	50	50	40	65	51.25	1	15	10	10	20	35	40	30	45	37.5	35	30	20	40	31.25	15	10	15	30	20	20	5	10	13.75	20	23.75	1	3	1	2	2	2	2	1	0	0
0	68	1	1	0	0	0	0	0	60	80	95	90	81.25	1	40	55	65	65	20	25	30	25	25	65	85	70	85	76.25	55	60	65	75	10	25	5	10	12.5	5	12.5	0	2	2	1	1	2	2	1	0	0
1	57	1	1	0	0	0	0	1	40	65	70	65	60	1	15	25	35	35	25	40	35	30	32.5	25	30	25	50	32.5	5	10	15	20	20	20	10	30	20	27.5	12.5	1	1	1	1	1	2	2	3	0	0
0	50	1	0	0	0	0	0	0	35	30	45	45	38.75	0	15	15	20	25	20	15	25	20	20	20	20	25	30	23.75	15	5	10	15	5	15	15	15	12.5	15	7.5	1	3	1	3	2	2	2	3	0	0
0	48	1	1	0	0	0	0	0	75	80	85	85	81.25	1	30	35	45	60	45	45	40	25	38.75	20	25	20	25	22.5	15	15	15	15	5	10	5	10	7.5	58.75	31.25	1	1	1	1	1	3	3	3	2	1
0	53	1	0	0	0	0	0	0	20	15	10	20	16.25	0	15	10	5	10	5	5	5	10	6.25	15	15	10	40	20	10	10	0	15	5	5	10	25	11.25	-3.75	-5	1	1	1	1	1	2	2	3	0	0
0	47	1	0	0	0	0	0	1	50	60	60	45	53.75	1	20	30	45	20	30	30	15	25	25	60	60	35	30	46.25	25	30	30	15	35	30	5	15	21.25	7.5	3.75	0	3	1	2	2	2	2	2	0	0
1	14	0	1	0	0	0	0	0	75	70	65	65	68.75	1	5	15	25	15	70	55	40	50	53.75	70	70	60	55	63.75	25	30	20	25	45	40	40	30	38.75	5	15	0	2	2	1	1	2	2	3	1	0
0	65	1	0	0	0	0	0	0	60	70	70	85	71.25	1	35	25	40	60	25	45	30	25	31.25	35	25	30	55	36.25	25	10	20	45	10	15	10	10	11.25	35	20	1	3	1	2	2	2	2	1	0	0
0	48	1	1	0	0	0	0	0	40	35	15	25	28.75	0	20	20	5	15	20	15	10	10	13.75	20	25	5	20	17.5	20	10	5	15	0	15	0	5	5	11.25	8.75	1	1	1	1	1	1	0	0	0	0
0	51	1	0	0	1	0	0	0	25	30	20	55	32.5	0	15	10	15	10	10	20	5	45	20	25	25	15	10	18.75	15	5	5	5	10	20	10	5	11.25	13.75	8.75	1	3	1	2	2	2	2	2	0	0
1	40	0	0	0	0	0	0	1	70	60	65	55	62.5	1	30	15	20	20	40	45	45	35	41.25	45	25	20	35	31.25	35	15	15	25	10	10	5	10	8.75	31.25	32.5	1	3	1	2	2	2	2	1	0	0
0	32	0	1	0	0	0	0	1	25	30	15	25	23.75	0	15	15	15	20	10	15	0	5	7.5	30	25	10	20	21.25	15	0	0	10	15	25	10	10	15	2.5	-7.5	1	1	1	1	1	2	2	2	0	0
1	54	1	1	0	0	0	0	0	40	50	40	45	43.75	1	25	30	30	25	15	20	10	20	16.25	40	40	20	35	33.75	30	15	10	10	10	25	10	25	17.5	10	-1.25	1	1	1	1	1	2	2	1	0	0
0	63	1	0	0	0	0	0	0	55	80	70	95	75	1	40	50	55	65	15	30	15	30	22.5	65	75	90	90	80	40	40	55	70	25	35	35	20	28.75	-5	-6.25	0	5	2	2	2	3	3	1	2	1
1	40	0	0	0	0	1	0	0	60	50	60	60	57.5	1	25	5	10	25	35	45	50	35	41.25	60	50	35	35	45	20	10	25	10	40	40	10	25	28.75	12.5	12.5	1	3	1	2	2	3	3	3	2	1
1	37	0	0	0	0	0	0	0	30	30	20	20	25	0	20	15	10	10	10	15	10	10	11.25	30	25	15	25	23.75	20	10	10	15	10	15	5	10	10	1.25	1.25	1	3	1	2	2	1	0	0	0	0
0	51	1	0	0	0	0	0	1	30	20	15	30	23.75	0	20	0	5	25	10	20	10	5	11.25	20	20	15	25	20	10	5	5	15	10	15	10	10	11.25	3.75	0	1	1	1	1	1	1	0	0	0	0
0	67	1	0	0	1	1	0	0	55	90	75	55	68.75	1	40	55	60	45	15	35	15	10	18.75	60	85	60	60	66.25	40	40	50	40	20	45	10	20	23.75	2.5	-5	0	1	1	1	1	1	0	0	0	0
[truncated: 27 more columns]
